# Supplementary material for: Turn-on type afterglow probe for Hg2+sensing by a PVA-mediated triplet sensitizer
Source: Royal Society of Chemistry journal article supplement (doi:10.1039/d3nj01281f), 2023-01-01
Supplement: d3nj01281f1.pdf [file d3nj01281f1.pdf]

## Electronic Supporting Information

### Turn-on type afterglow probe for Hg<sup>2+</sup> sensing by a PVA-mediated triplet sensitizer

Satoshi Takegawa, Masato Ito and Yuji Kubo\*

*Department of Applied Chemistry, Graduate School of Urban Environmental Sciences, Tokyo Metropolitan University, 1-1 Minami-Osawa, Hachioji, Tokyo, 192-0397*

#### Table of contents

|                                                                                                                                                                                   |            |
|-----------------------------------------------------------------------------------------------------------------------------------------------------------------------------------|------------|
| <b>General</b> .....                                                                                                                                                              | S-2        |
| <b>Materials</b> .....                                                                                                                                                            | S-2        |
| <b>Synthesis</b> .....                                                                                                                                                            | S-2 ~ S-3  |
| <b>Fabrication of films</b> .....                                                                                                                                                 | S-3        |
| <b>References</b> .....                                                                                                                                                           | S-3        |
| <b>DFT/TD-DFT calculation</b> .....                                                                                                                                               | S-4 ~ S-7  |
| <b>Table S1.</b> Energy levels and electronic transition characters of <b>BPBA</b> .....                                                                                          | S-4 ~ S-5  |
| <b>Figure S1.</b> Molecular orbitals of <b>BPBA</b> calculated at $\omega$ B97X-D3/def2-TZVP level .....                                                                          | S-5        |
| <b>Table S2.</b> Energy levels and electronic transition characters of <b>1</b> .....                                                                                             | S-5 ~ S-6  |
| <b>Figure S2.</b> Molecular orbitals of <b>1</b> calculated at $\omega$ B97X-D3/def2-TZVP level .....                                                                             | S-6        |
| <b>Table S3.</b> Energy levels and electronic transition characters of <b>2</b> .....                                                                                             | S-6 ~ S-7  |
| <b>Figure S3.</b> Molecular orbitals of <b>2</b> calculated at $\omega$ B97X-D3/def2-TZVP level .....                                                                             | S-7        |
| <b>Figure S4.</b> Energy diagrams of <b>1</b> and <b>2</b> .....                                                                                                                  | S-8        |
| <b>Figure S5.</b> FT IR spectra of PVA film and <b>BPB@PVA</b> .....                                                                                                              | S-8        |
| <b>Figure S6.</b> Change in the delayed emission intensity ratios ( $I_{530\text{ nm}}/I_{460\text{ nm}}$ ) by varying concentrations of <b>2</b> doped into <b>BPB@PVA</b> ..... | S-8        |
| <b>Characterization</b> .....                                                                                                                                                     | S-9 ~ S-14 |
| <b>Figure S7.</b> <sup>1</sup> H NMR spectrum (400 MHz) of <b>BPBA</b> in DMSO- <i>d</i> <sub>6</sub> .                                                                           |            |
| <b>Figure S8.</b> <sup>13</sup> C NMR spectrum (101 MHz) of <b>BPBA</b> in DMSO- <i>d</i> <sub>6</sub> .                                                                          |            |
| <b>Figure S9.</b> HR FAB-MS spectra of <b>BPBA</b> .                                                                                                                              |            |
| <b>Figure S10.</b> <sup>1</sup> H NMR spectrum (500 MHz) of <b>1</b> in CDCl <sub>3</sub> .                                                                                       |            |
| <b>Figure S11.</b> <sup>13</sup> C NMR spectrum (126 MHz) of <b>1</b> in DMSO- <i>d</i> <sub>6</sub> .                                                                            |            |
| <b>Figure S12.</b> FAB-MS spectra of <b>1</b> .                                                                                                                                   |            |

## Experimental Section

### General

NMR spectra were measured on a Bruker Advance 500 spectrometer ( $^1\text{H}$ : 500 MHz,  $^{13}\text{C}$ : 126 MHz) or JEOL JNM-ESC400 ( $^1\text{H}$ : 400 MHz,  $^{13}\text{C}$ : 101 MHz). In  $^1\text{H}$  and  $^{13}\text{C}$  NMR measurements, chemical shifts ( $\delta$ ) are reported downfield from the internal standard  $\text{Me}_4\text{Si}$  and  $\text{BF}_3\cdot\text{OEt}_2$ , respectively. The absorption and emission were measured using Shimadzu UV-3600 UV/vis spectroscopy and a JASCO FP-8500 spectrofluorometer, respectively. FT-IR spectra were recorded on a JASCO FT/IR-4100 spectrometer with NaCl salt plate. The absolute photoluminescence quantum yields ( $\Phi$ ) for emission up to 650 nm were determined by JASCO FP-8500 spectrofluorometer equipped integral sphere ( $\phi = 60$  mm). Photographic images were taken with digital camera (Canon, EOS Kiss X8i).

### Materials

Unless otherwise indicated, reagents used for the synthesis were commercially available and were used as supplied. Bis[4-(4,4,5,5-tetramethyl-1,3,2-dioxaborolan-2-yl)phenyl]methanone<sup>1</sup> and 2-methoxy-9*H*-thioxanthen-9-one **2**<sup>2</sup> were prepared according to method previously reported.

### Bis[4-dihydroxyborylphenyl]methanone BPBA

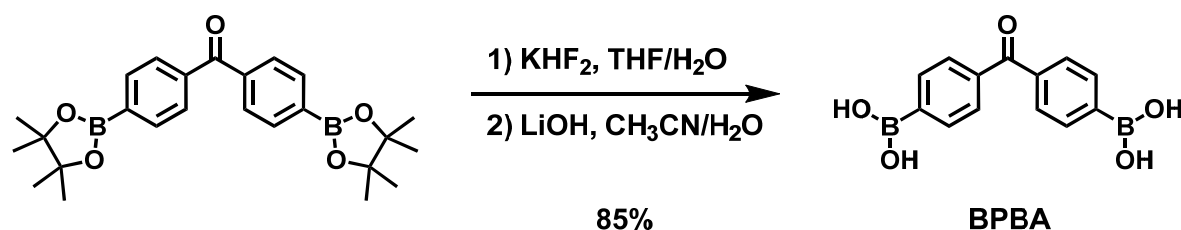

**Scheme 1.** Synthesis route of **BPBA**.

To a solution of bis[4-(4,4,5,5-tetramethyl-1,3,2-dioxaborolan-2-yl)phenyl]methanone (0.262 g, 0.60 mmol) in THF (10 mL) was added 3.0 M  $\text{KHF}_2$  aqueous solution (1.0 mL). The resultant solution was stirred for 3 h at room temperature. After adding  $\text{CH}_3\text{OH}$  and  $\text{H}_2\text{O}$ , the solution was evaporated to remove pinacol as side product. The solid was extracted with  $\text{CH}_3\text{CN}$  to obtain the intermediate, being dissolved in  $\text{CH}_3\text{CN}$  (8 mL) and  $\text{H}_2\text{O}$  (9 mL). To the solution was added an aqueous solution of 1.0 M  $\text{LiOH}$  (6.0 mL) for 22 h. After neutralization with 1M  $\text{HCl}$ , the solution was extracted with  $\text{CH}_3\text{CN}$  for three times. The organic layer was evaporated to obtain white solid in 85% yield.  $^1\text{H}$  NMR (400 MHz,  $\text{DMSO}-d_6$ ):  $\delta$  (ppm), 8.32 (s, 4H), 7.94 (d,  $J = 8.0$  Hz, 4H), 7.68 (d,  $J = 8.0$  Hz).  $^{13}\text{C}$  NMR (101 MHz,  $\text{DMSO}-d_6$ ):  $\delta$  (ppm), 196.4, 138.2, 134.1, 128.5. The signals arising from the carbon atoms bound to the boron one were undetectable due to the quadrupolar relaxation. HRMS (FAB): calcd for  $\text{C}_{19}\text{H}_{21}\text{B}_2\text{O}_7$  [ $\text{M}(\text{Glycerol})_2 + \text{H}$ ]<sup>+</sup>: 383.1468, found 383.1469. Glycerol was used as a matrix.

## 2-Methoxy-9H- thioxanthene-9-thione 1

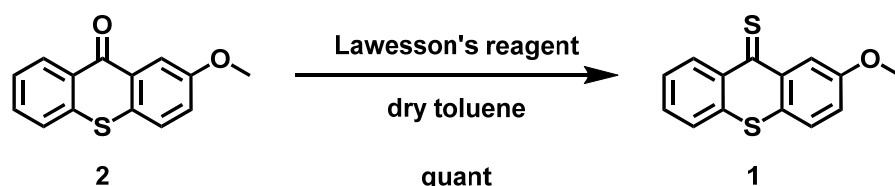

Scheme 2. Synthesis route of **1**.

2-Methoxy-thioxanthene-9-one **2** (0.314 g, 1.3 mmol) and Lawesson's reagent (1.13 g, 2.8 mmol) were dissolved in toluene (10 mL) under N<sub>2</sub> atmosphere. The resultant solution was refluxed at 80 °C for 3 h. After quenching the reaction by water, the solution was extracted with AcOEt for three times. And the organic phase was then dried with Na<sub>2</sub>SO<sub>4</sub>, evaporated in vacuo and chromatographed on silica gel (Wacogel C-300) using CH<sub>2</sub>Cl<sub>2</sub>/hexane (1:1 v/v). In this way, 0.339 g of **1** was obtained quantitatively. <sup>1</sup>H NMR (500 MHz, CDCl<sub>3</sub>):  $\delta$  (ppm), 9.08 (d,  $J$  = 8.5 Hz, 1H), 8.59 (d,  $J$  = 2.8 Hz 1H), 7.61 (d,  $J$  = 3.7 Hz, 2H), 7.53 (d,  $J$  = 8.8, 1H), 7.46 (dt,  $J$  = 8.4, 4.2 Hz, 1H), 7.30 (dd,  $J$  = 8.8, 2.8 Hz, 1H), 3.96 (s, 3H). <sup>13</sup>C NMR (126 MHz, DMSO-*d*<sub>6</sub>):  $\delta$  (ppm), 207.7, 158.9, 137.4, 135.8, 133.1, 132.3, 131.9, 128.3, 127.5, 126.7, 124.0, 122.5, 114.0, 55.5. FAB-MS:  $m/z$  = 259 [M+H]<sup>+</sup>. Elemental analysis for C<sub>14</sub>H<sub>10</sub>OS<sub>2</sub>: C 65.09, H 3.90, N 0, Found: C 65.05, H 3.92.

### Fabrication of benzoylphenyl boronate-crosslinked PVA film (BPB@PVA)

The film was fabricated by drop-casting DMSO solution (500  $\mu$ L) of commercial PVA (number average molecular weight ( $M_n$ ) of 89000 – 98000; saponification number = 99%, 0.40 unit M<sup>3</sup>) and **BPBA** (8.0 mM), followed by solvent exchange with water and dried in vacuo. The resultant films were characterized by FT-IR cm<sup>-1</sup>); 3336, 2942, 1652, 1418, 1306, 1094, 931, 853, 699, 672, 642.

### Fabrication of 2-doped BPB@PVA (2/BPB@PVA)

The film was fabricated by drop-casting DMSO solution (500  $\mu$ L) of commercial PVA (number average molecular weight ( $M_n$ ) of 89000 – 98000; saponification number = 99%, 0.40 unit M<sup>3</sup>), **BPBA** (8.0 mM) and **2** (0.40 mM), followed by solvent exchange with water and dried in vacuo.

### Fabrication of 1-doped BPB@PVA (1/BPB@PVA)

The film was fabricated by drop-casting DMSO solution (500  $\mu$ L) of commercial PVA (number average molecular weight ( $M_n$ ) of 89000 – 98000; saponification number = 99%, 0.40 unit M<sup>3</sup>), **BPBA** (8.0 mM) and **1** (0.40 mM), followed by solvent exchange with water and dried in vacuo.

## References

1. X. Miao, Z. Cai, J. Li, L. Liu, J. Wu, B. Li, L. Ying, F. Silly, W. Deng and Y. Cao, *ChemPhotoChem*, 2021, **5**, 626-631.
2. M. Bhanuchandra, H. Yorimitsu and A. Osuka, *Org. Lett.*, 2016, **18**, 384-387.
3. The concentration was based on monomer unit.

### DFT/TD-DFT calculation

Density functional theory (DFT) calculations at the  $\omega$ B97X-D3/def2-TZVP level were performed in the Orca 4.2.1 software. These molecular orbitals were visualized using Gauss view 6.0.16 program. The molecular structures of BPBA, **1** and **2** optimized in the lowest singlet excited state are displayed below.

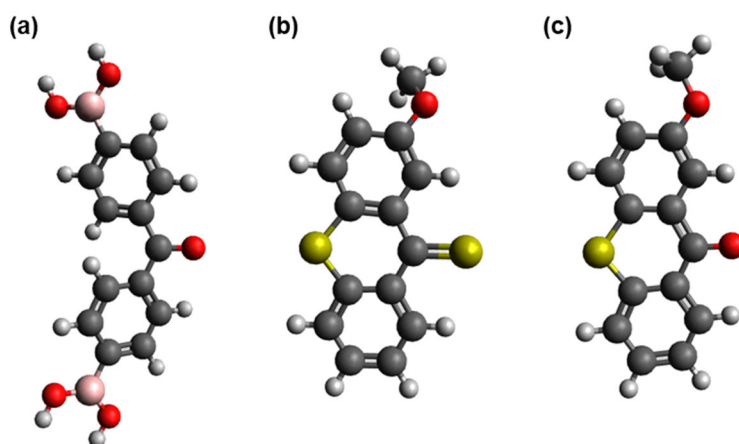

**Table S1.** Energy levels and electronic transition characters of BPBA optimized in the lowest singlet excited state. The frontier molecular orbitals of the dye are shown in Figure S1.

| State          | Energy               | Oscillator strength | Transition            |
|----------------|----------------------|---------------------|-----------------------|
| S <sub>1</sub> | 3.261 eV<br>(380 nm) | 0.0011              | HOMO-4→LUMO (43.8%)   |
|                |                      |                     | HOMO→LUMO (42.8%)     |
| S <sub>2</sub> | 4.700 eV<br>(264 nm) | 0.0259              | HOMO-2→LUMO (55.9%)   |
|                |                      |                     | HOMO-4→LUMO (12.8%)   |
|                |                      |                     | HOMO-3→LUMO+1 (10.6%) |
| S <sub>3</sub> | 4.737 eV<br>(262 nm) | 0.1751              | HOMO-3→LUMO (41.4%)   |
|                |                      |                     | HOMO-1→LUMO (31.5%)   |
|                |                      |                     | HOMO-2→LUMO+1 (7.6%)  |
| S <sub>4</sub> | 4.824 eV<br>(257 nm) | 0.5519              | HOMO-1→LUMO (54.2%)   |
|                |                      |                     | HOMO-3→LUMO (30.0%)   |
| S <sub>5</sub> | 5.009 eV<br>(248 nm) | 0.1151              | HOMO→LUMO (40.9%)     |
|                |                      |                     | HOMO-4→LUMO (30.3%)   |
| T <sub>1</sub> | 2.536 eV<br>(489 nm) | 0                   | HOMO→LUMO (76.4%)     |
|                |                      |                     | HOMO-1→LUMO+1 (5.3%)  |
| T <sub>2</sub> | 2.977 eV<br>(417 nm) | 0                   | HOMO-4→LUMO (65.3%)   |
|                |                      |                     | HOMO-2→LUMO (10.6%)   |
|                |                      |                     | HOMO-1→LUMO+1 (5.7%)  |
|                |                      |                     | HOMO-4→LUMO+6 (5.2%)  |

|                |                      |   |                                                                    |
|----------------|----------------------|---|--------------------------------------------------------------------|
| T <sub>3</sub> | 3.242 eV<br>(382 nm) | 0 | HOMO-1→LUMO (54.9%)<br>HOMO→LUMO+1 (16.3%)<br>HOMO-3→LUMO+3 (5.4%) |
| T <sub>4</sub> | 3.909 eV<br>(317 nm) | 0 | HOMO-2→LUMO (60.4%)<br>HOMO-3→LUMO+1 (22.2%)                       |
| T <sub>5</sub> | 3.949 eV<br>(314 nm) | 0 | HOMO-3→LUMO (64.7%)<br>HOMO-2→LUMO+1 (25.9%)                       |

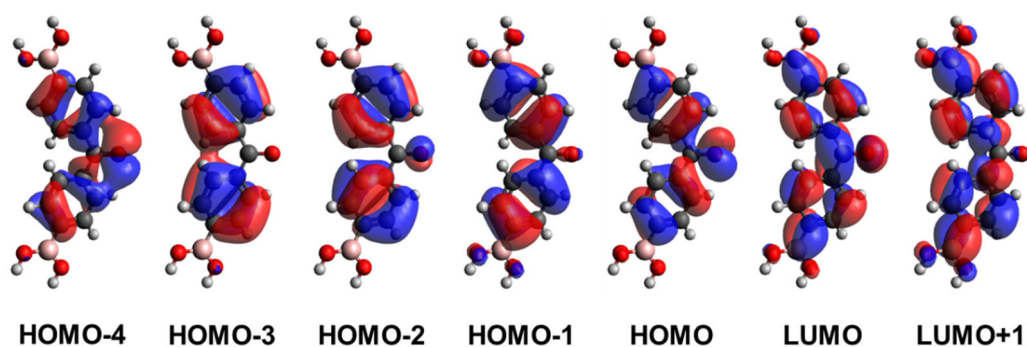

**Figure S1.** Molecular orbitals of **BPBA** calculated at  $\omega$ B97X-D3/def2-TZVP level.

**Table S2.** Energy levels and electronic transition characters of **1** optimized in the lowest singlet excited state.

| State          | Energy               | Oscillator strength | Transition                                                        |
|----------------|----------------------|---------------------|-------------------------------------------------------------------|
| S <sub>1</sub> | 2.001 eV<br>(620 nm) | 0.0004              | HOMO-1→LUMO (94.8%)                                               |
| S <sub>2</sub> | 3.151 eV<br>(393 nm) | 0.1907              | HOMO→LUMO (96.0%)                                                 |
| S <sub>3</sub> | 3.779 eV<br>(328 nm) | 0.0331              | HOMO-2→LUMO (94.5%)                                               |
| S <sub>4</sub> | 4.312 eV<br>(288 nm) | 0.0095              | HOMO-3→LUMO (51.6%)<br>HOMO→LUMO+1 (33.9%)                        |
| S <sub>5</sub> | 4.535 eV<br>(273 nm) | 0.0729              | HOMO-4→LUMO (74.4%)<br>HOMO-2→LUMO+1 (4.6%)<br>HOMO-3→LUMO (4.6%) |
| S <sub>6</sub> | 4.920 eV<br>(252 nm) | 0.4982              | HOMO→LUMO+1 (54.5%)<br>HOMO-3→LUMO (20.9%)<br>HOMO-4→LUMO (13.2%) |
| T <sub>1</sub> | 1.453 eV<br>(854 nm) | 0                   | HOMO→LUMO (60.7%)<br>HOMO-2→LUMO (29.0%)                          |
| T <sub>2</sub> | 1.644 eV<br>(754 nm) | 0                   | HOMO-1→LUMO (92.3%)                                               |

|                |                      |   |                                                                                           |
|----------------|----------------------|---|-------------------------------------------------------------------------------------------|
| T <sub>3</sub> | 2.777 eV<br>(447 nm) | 0 | HOMO-2→LUMO (55.1%)<br>HOMO→LUMO (32.0%)                                                  |
| T <sub>4</sub> | 3.180 eV<br>(390 nm) | 0 | HOMO-4→LUMO (32.2%)<br>HOMO→LUMO+1 (22.4%)<br>HOMO-3→LUMO (13.4%)<br>HOMO-2→LUMO+3 (6.6%) |
| T <sub>5</sub> | 3.656 eV<br>(339 nm) | 0 | HOMO-3→LUMO (35.2%)<br>HOMO-4→LUMO (22.9%)<br>HOMO→LUMO+1 (15.7)                          |

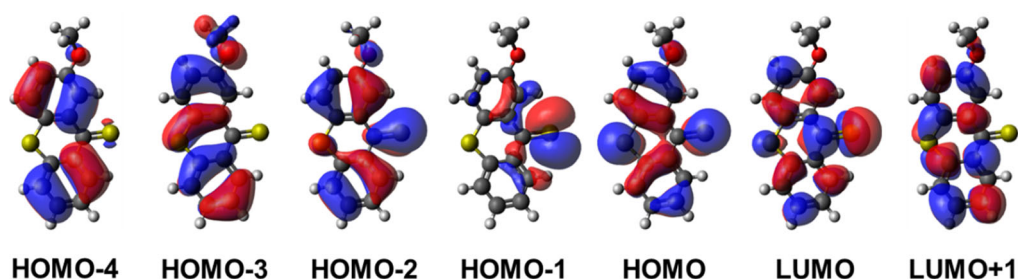

**Figure S2.** Molecular orbitals of **1** calculated at  $\omega$ B97X-D3/def2-TZVP level.

**Table S3.** Energy levels and electronic transition characters of **2** optimized in the lowest singlet excited state. The frontier molecular orbitals of the dye are shown in Figure S3.

| State          | Energy               | Oscillator strength | Transition                                                                               |
|----------------|----------------------|---------------------|------------------------------------------------------------------------------------------|
| S <sub>1</sub> | 3.339 eV<br>(371 nm) | 0.0002              | HOMO-2→LUMO (88.0%)<br>HOMO-2→LUMO+7 (5.6%)                                              |
| S <sub>2</sub> | 3.640 eV<br>(341 nm) | 0.0957              | HOMO→LUMO (93.7%)                                                                        |
| S <sub>3</sub> | 4.523 eV<br>(274 nm) | 0.0075              | HOMO→LUMO+1 (40.6%)<br>HOMO-1→LUMO (34.3%)                                               |
| S <sub>4</sub> | 4.885 eV<br>(254 nm) | 0.0044              | HOMO-4→LUMO (43.2%)<br>HOMO→LUMO+1 (13.3%)<br>HOMO→LUMO+2 (12.3%)<br>HOMO-1→LUMO (11.3%) |
| S <sub>5</sub> | 4.999 eV<br>(248 nm) | 0.0504              | HOMO-3→LUMO (50.8%)<br>HOMO-1→LUMO (25.0%)                                               |
| S <sub>6</sub> | 5.304 eV<br>(234 nm) | 0.8045              | HOMO-4→LUMO (27.8%)<br>HOMO→LUMO+1 (25.5%)<br>HOMO→LUMO+4 (16.1%)<br>HOMO-3→LUMO (10.6%) |

|                |                      |   |                                                                                                                 |
|----------------|----------------------|---|-----------------------------------------------------------------------------------------------------------------|
| T <sub>1</sub> | 2.486 eV<br>(499 nm) | 0 | HOMO→LUMO (55.0%)<br>HOMO-1→LUMO (15.5%)<br>HOMO-3→LUMO (13.8%)                                                 |
| T <sub>2</sub> | 2.873 eV<br>(432 nm) | 0 | HOMO-2→LUMO (86.6%)<br>HOMO-2→LUMO+7 (6.6%)                                                                     |
| T <sub>3</sub> | 3.042 eV<br>(408 nm) | 0 | HOMO→LUMO (32.8%)<br>HOMO-1→LUMO (21.4%)<br>HOMO-3→LUMO (13.7%)<br>HOMO-4→LUMO+2 (7.9%)<br>HOMO→LUMO+3 (7.0%)   |
| T <sub>4</sub> | 3.210 eV<br>(386 nm) | 0 | HOMO-4→LUMO (31.4%)<br>HOMO→LUMO+1 (21.8%)<br>HOMO-3→LUMO+2 (9.4%)<br>HOMO-1→LUMO (5.2%)<br>HOMO→LUMO+2 (4.7%)  |
| T <sub>5</sub> | 3.768 eV<br>(329 nm) | 0 | HOMO-3→LUMO (22.7%)<br>HOMO→LUMO+1 (20.1%)<br>HOMO-1→LUMO (15.0%)<br>HOMO→LUMO+2 (14.5%)<br>HOMO-4→LUMO (11.4%) |

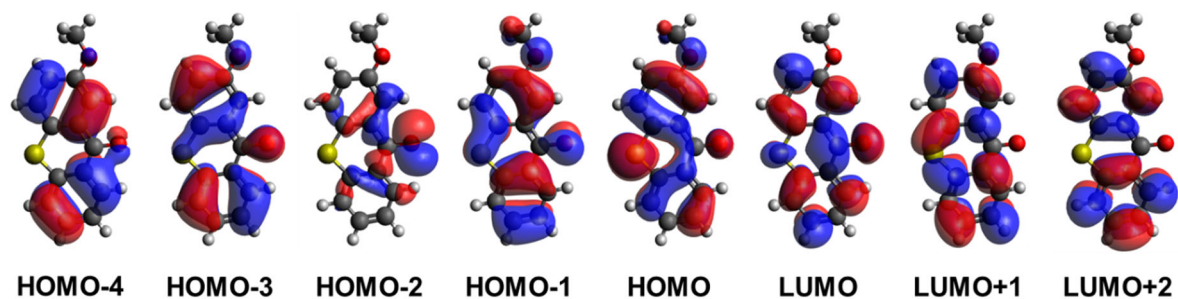

**Figure S3.** Molecular orbitals of **2** calculated at  $\omega$ B97X-D3/def2-TZVP level.

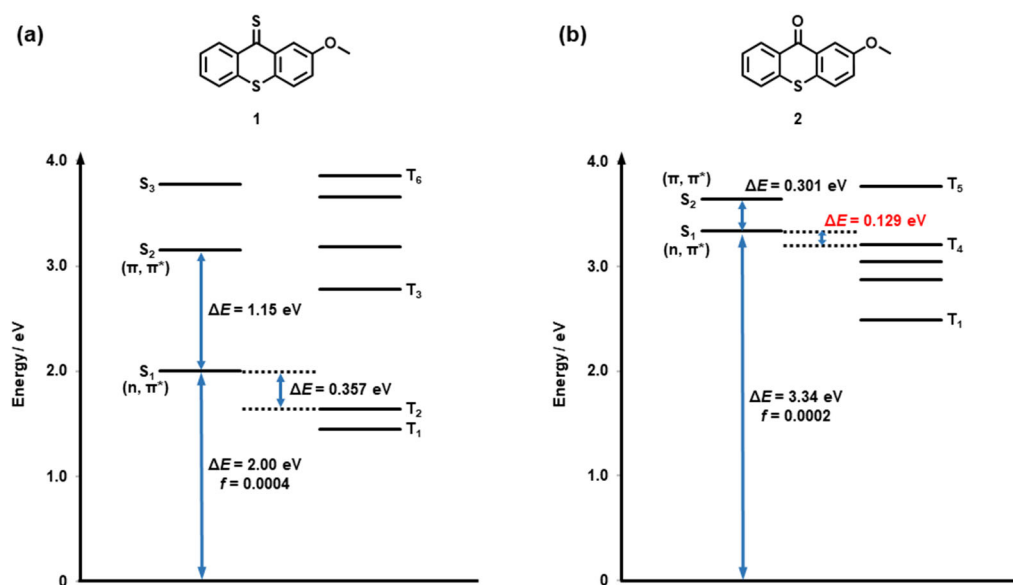

**Figure S4.** Energy diagrams of **1** (a) and **2** (b), optimized in the lowest singlet excited state.

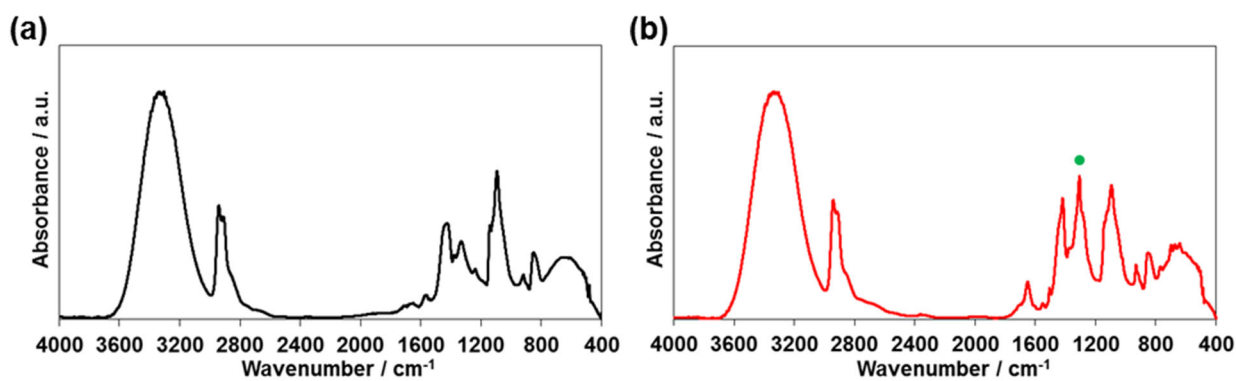

**Figure S5.** FT IR spectra of PVA film (a) and **BPB@PVA** (b).

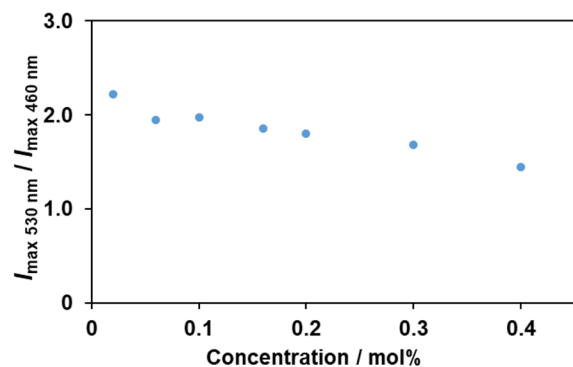

**Figure S6.** Change in the delayed emission intensity ratios ( $I_{530 \text{ nm}}/I_{460 \text{ nm}}$ ) by varying concentrations of **2** doped into **BPB@PVA**.  $\lambda_{\text{ex}} = 325 \text{ nm}$ . Delay time = 50 ms.



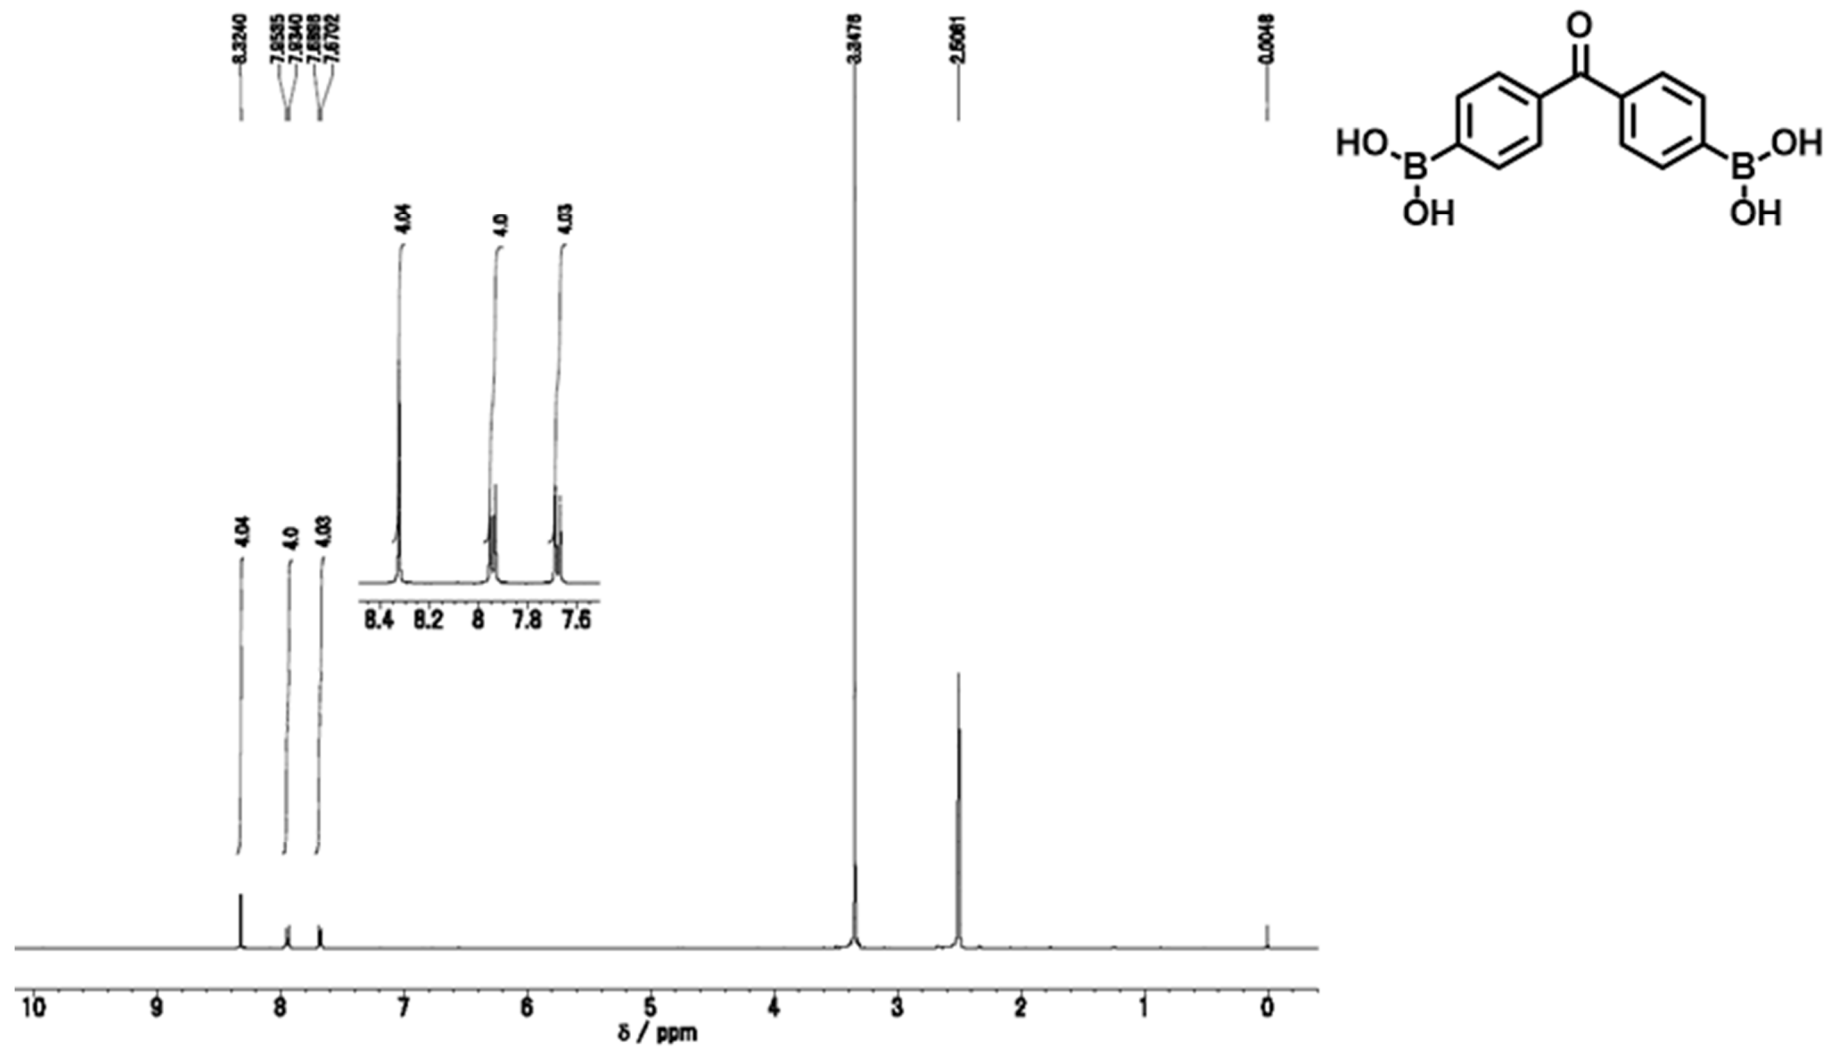

**Figure S7.**  $^1\text{H}$  NMR spectrum (400 MHz) of **BPBA** in  $\text{DMSO}-d_6$ .

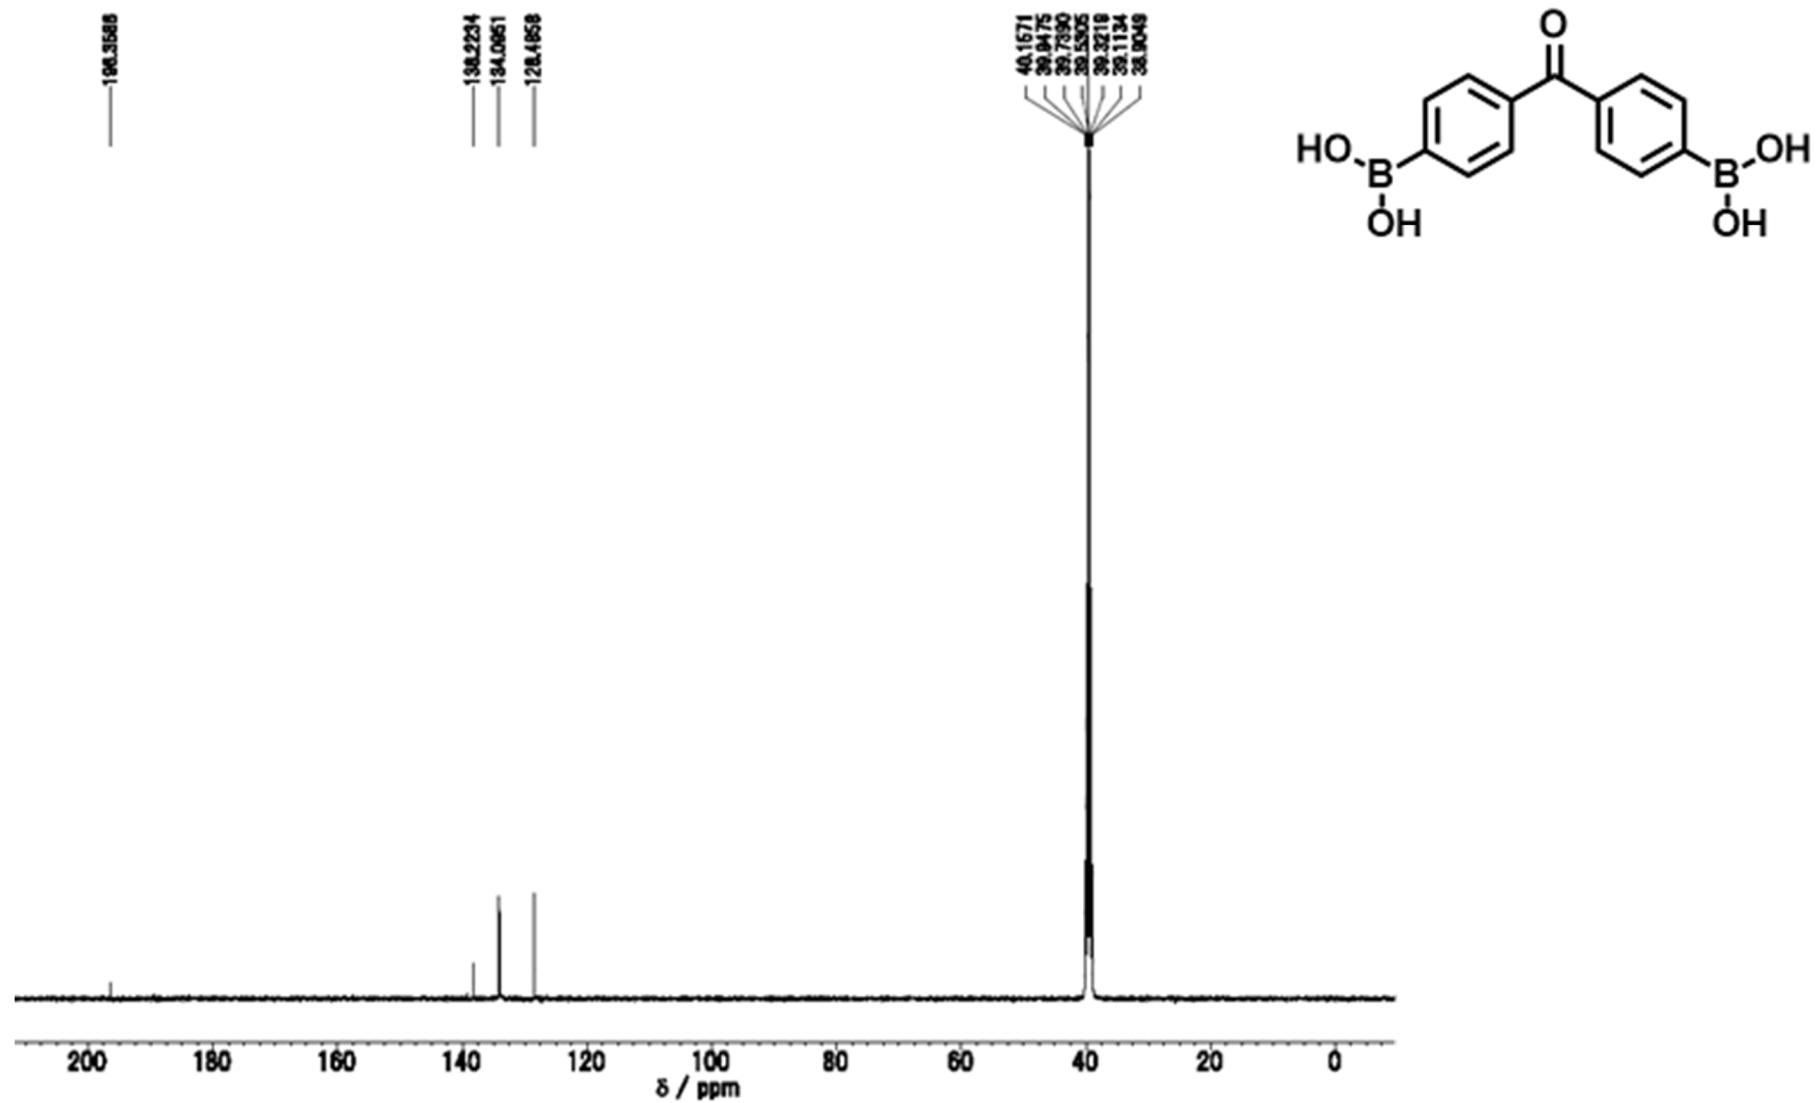

Figure S8.  $^{13}\text{C}$  NMR spectrum (101 MHz) of BPBA in  $\text{DMSO-}d_6$ .

[ TIC/RIC ]

Data : 20230224\_Takegawa\_1001 Date : 24-Feb-2023 12:31

Sample : -

Note : -

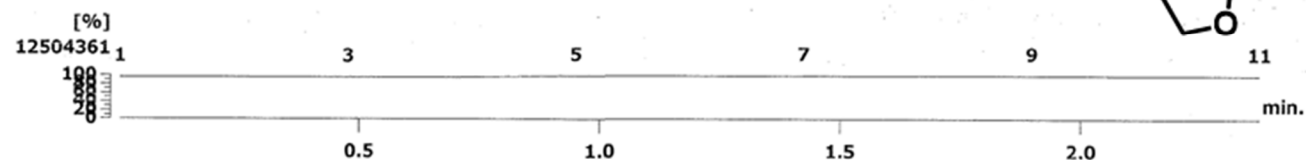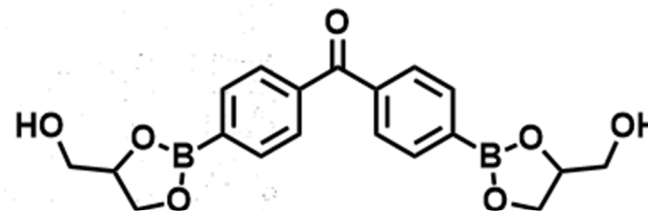

[ Mass Spectrum ]

Data : 20230224\_Takegawa\_1001 Date : 24-Feb-2023 12:31

RT : 1.66 min Scan# : (8,10)

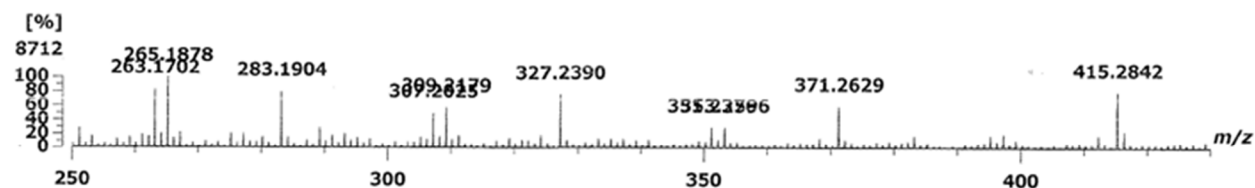

[ Mass Spectrum ]

Data : 20230224\_Takegawa\_1001 Date : 24-Feb-2023 12:31

RT : 1.66 min Scan# : (8,10)

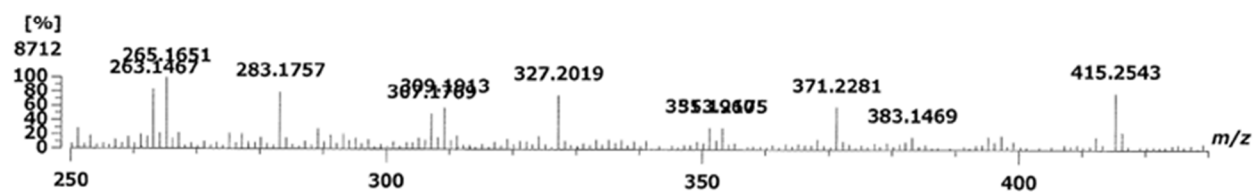

Figure S9. HR FAB-MS spectra of BPBA.

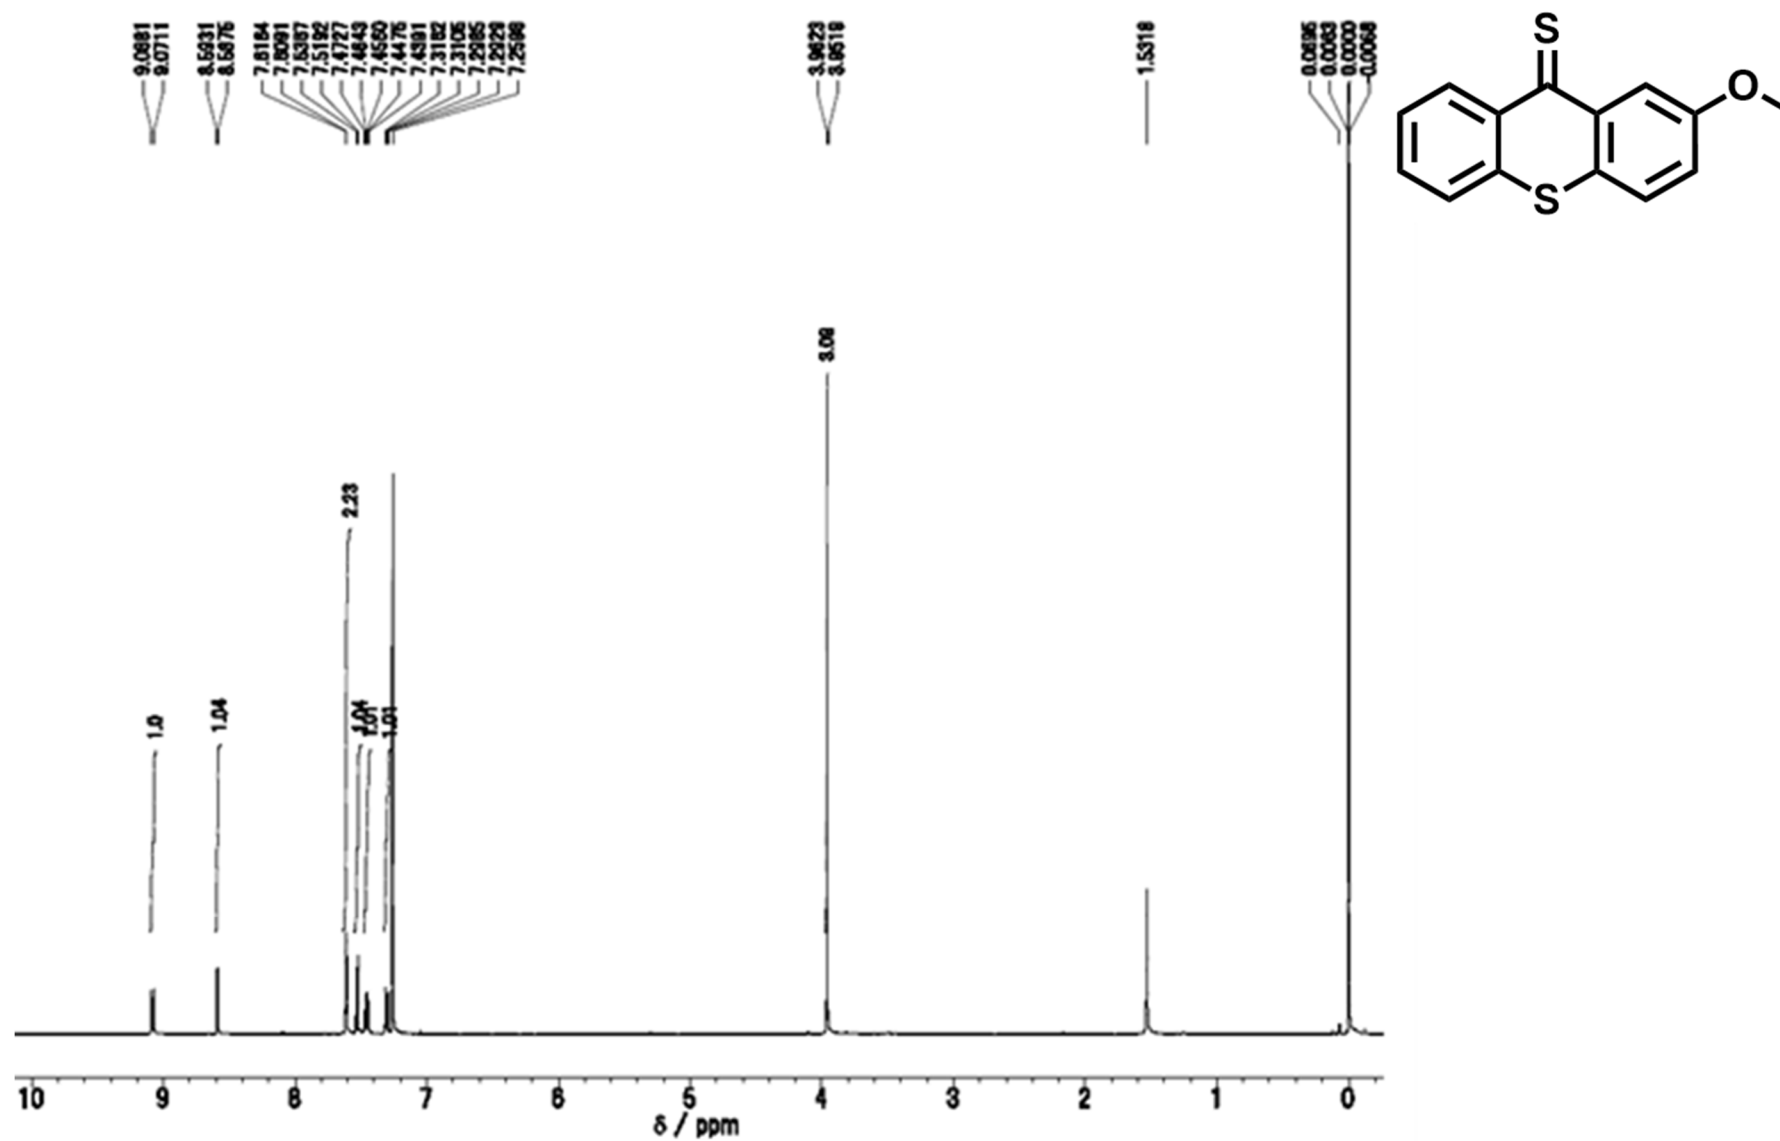

**Figure S10.** <sup>1</sup>H NMR spectrum (500 MHz) of **1** in CDCl<sub>3</sub>.

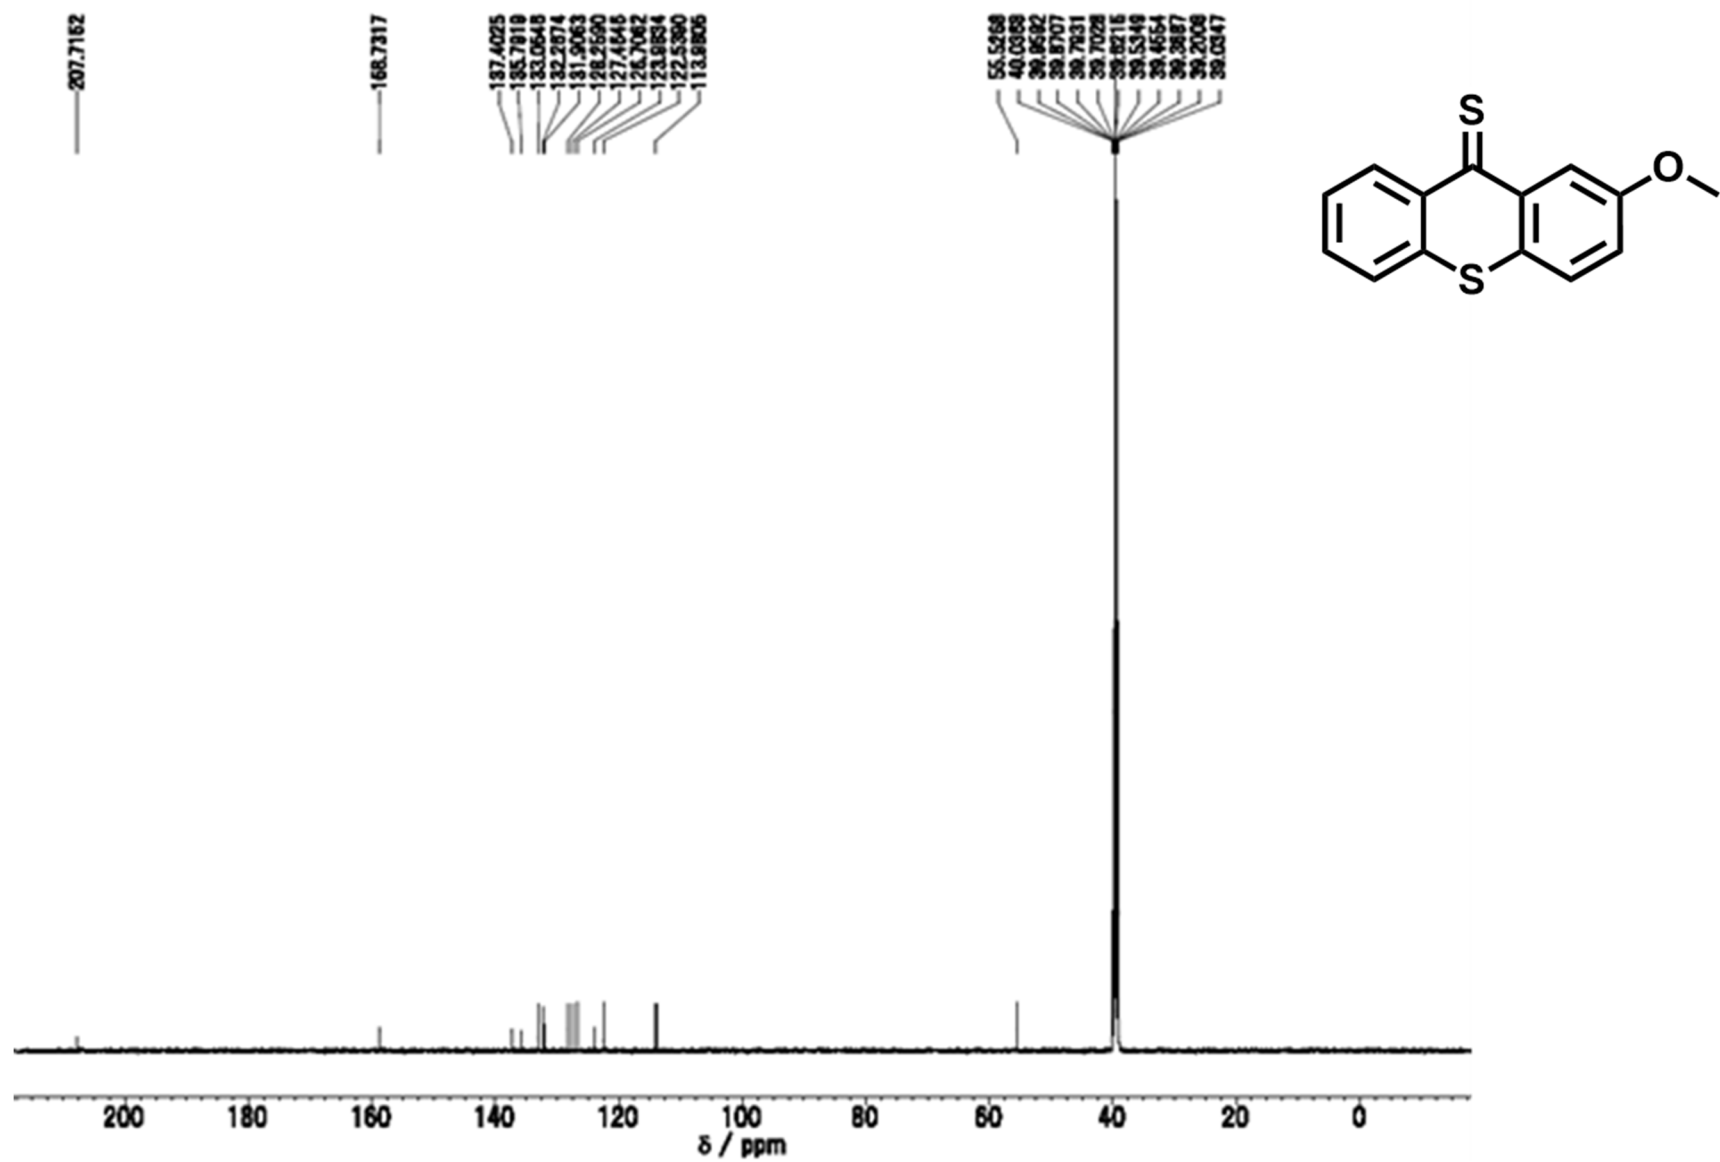

**Figure S11.**  $^{13}\text{C}$  NMR spectrum (126 MHz) of **1** in  $\text{DMSO-d}_6$ .

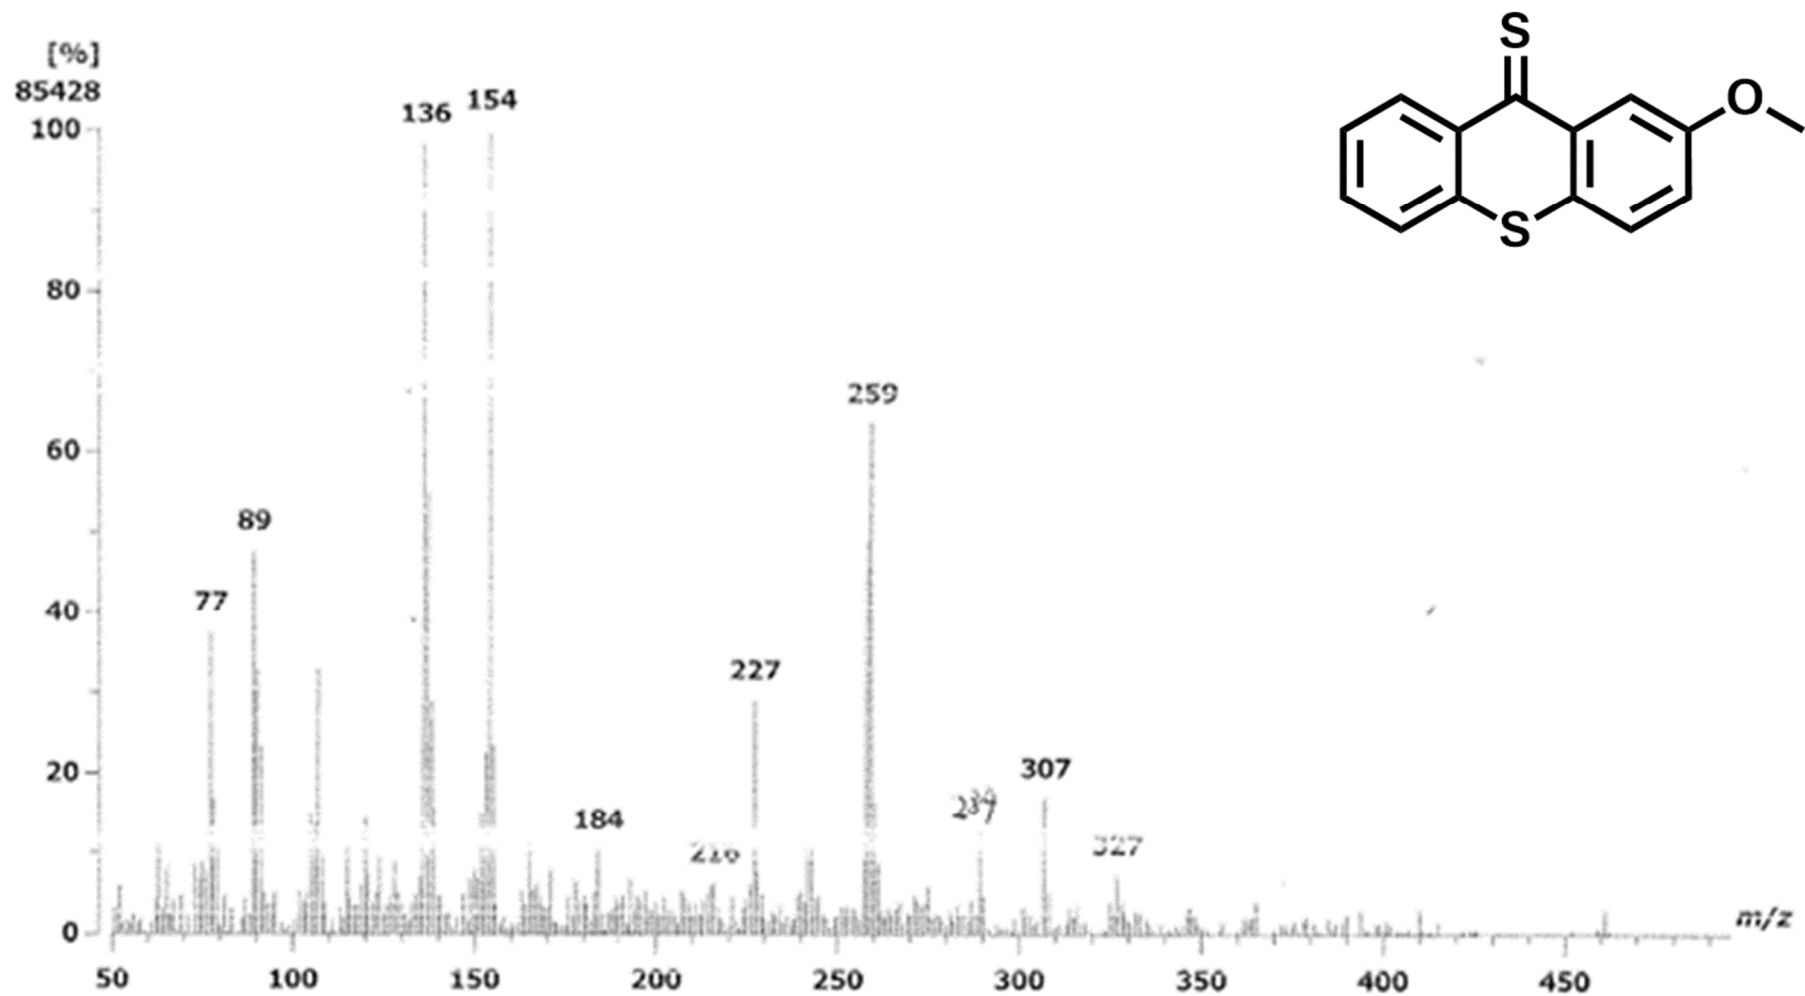

Figure S12. FAB-MS spectra of 1.
